# Supplementary material for: Fast screening of bacterial suspension culture conditions on chips
Source: Royal Society of Chemistry journal article supplement (doi:10.1039/c3lc51332g), 2013-12-11
Supplement: c3lc51332g.pdf [file c3lc51332g.pdf]

Electronic Supplementary Material (ESI) for Lab on a Chip  
This journal is © The Royal Society of Chemistry 2013

## Supporting Information for Lab on a Chip

### Fast Screening of Bacterial Suspension Culture Conditions on Chip

Yunfang Tang,<sup>ab</sup> Mingzhe Gan,<sup>a</sup> Yifei Xie,<sup>c</sup> Xudong Li,<sup>c</sup> and Liwei Chen<sup>\*a</sup>

[\*] Liwei Chen

E-mail: lwchen2008@sinano.ac.cn

<sup>a</sup> Suzhou Institute of Nano-Tech and Nano-Bionics, Chinese Academy of Sciences, 398 Ruoshui Road, Suzhou Industrial Park, Suzhou, P. R. China.

<sup>b</sup> University of Chinese Academy of Sciences, No.19A Yuquan Road, Beijing. P. R. China.

<sup>c</sup> Chengdu Institute of Biology, Chinese Academy of Sciences, No.9 Section 4, Renmin Nan Road, Chengdu, P. R. China

Electronic Supplementary Material (ESI) for Lab on a Chip  
This journal is © The Royal Society of Chemistry 2013

### Supporting information

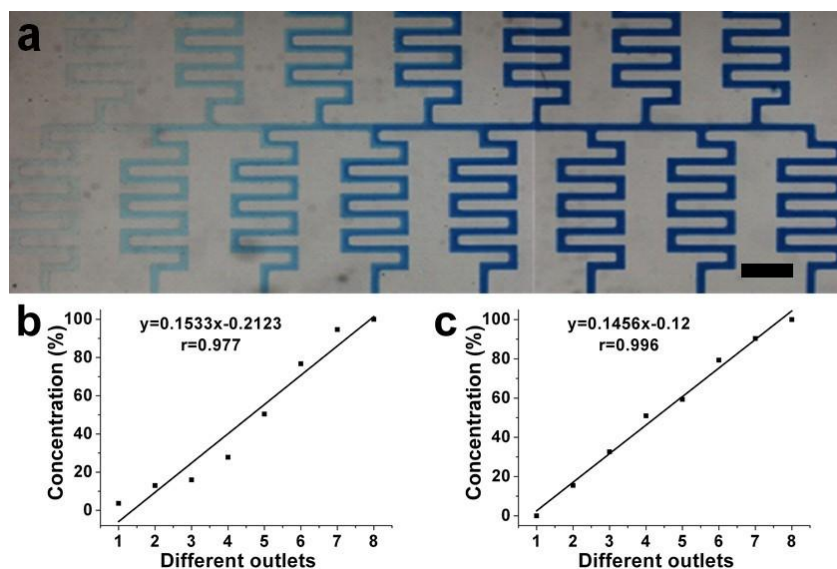

Fig. S1 (a) Optical micrograph of methylene blue solution concentration gradient on chip, scale bar: 500 μm; and quantitative concentration profile at the outlets under different geometry and flow conditions: (b) the S-shape mixing channel length: 6.6 mm, and the flow rate: 1.0 μL s<sup>-1</sup>; (c) the S-shape mixing channel length: 8.4 mm, and the flow rate: 0.2 μL s<sup>-1</sup>.

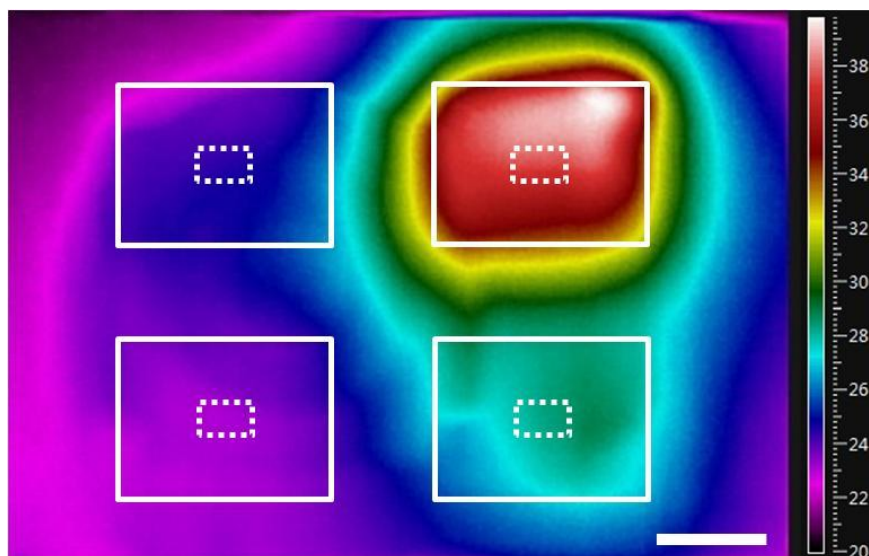

Fig.S2 Thermal image of the temperature-controlling chip. The solid squares are four temperature reservoirs independently set to 37 °C (upper right), 28 °C (lower right), 25 °C (upper left) and 22 °C (lower left). The dashed squares are the bacterial culture areas located at each temperature zones. Scale bar: 1 cm.

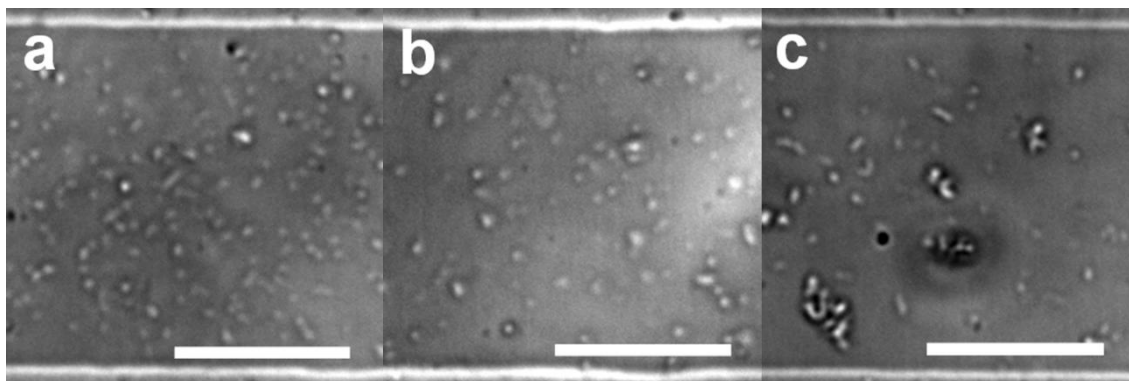

Fig. S3 *E. coli*'s biological morphology on chip: (a) pH=7, grows normally in single cells; (b) pH=5, grows normally in single cells; (c) pH=3, partially grows in clusters. Scale bar: 50 μm.

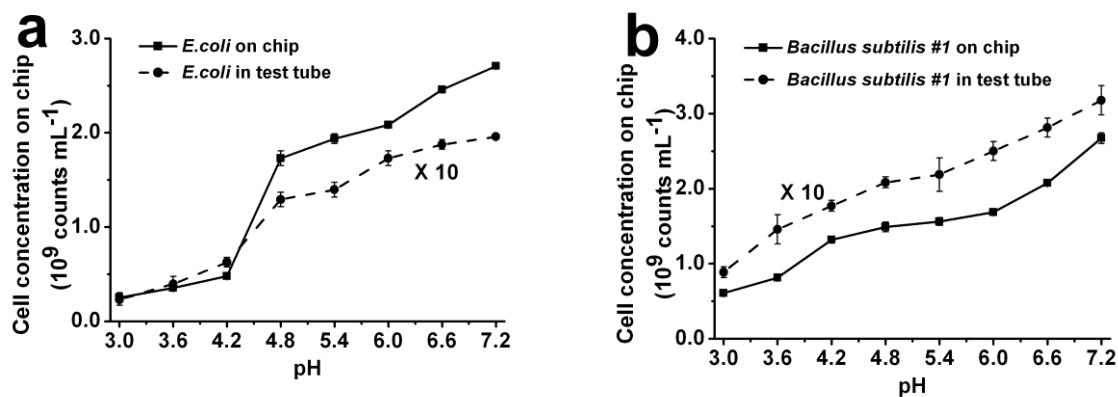

Fig.S4 (a) The effect of pH on the growth of *E. coli* on chip and in test tubes. The cell concentration in test tubes is multiplied by a factor of 10 for clarity; (b) The effect of pH on the growth of *Bacillus subtilis* #1 on chip and in test tubes (also multiplied by a factor of 10 for clarity).

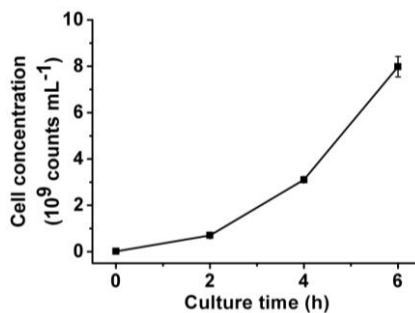

Fig.S5 Growth curve of *E. coli* at 37 °C on chip.
